# Supplementary material
Source: PubMed Central journal article supplement (PMC2836075)
Supplement: supp_M109.041913_jbc.M109.041913-3.pdf [file supp_M109.041913_jbc.M109.041913-3.pdf]

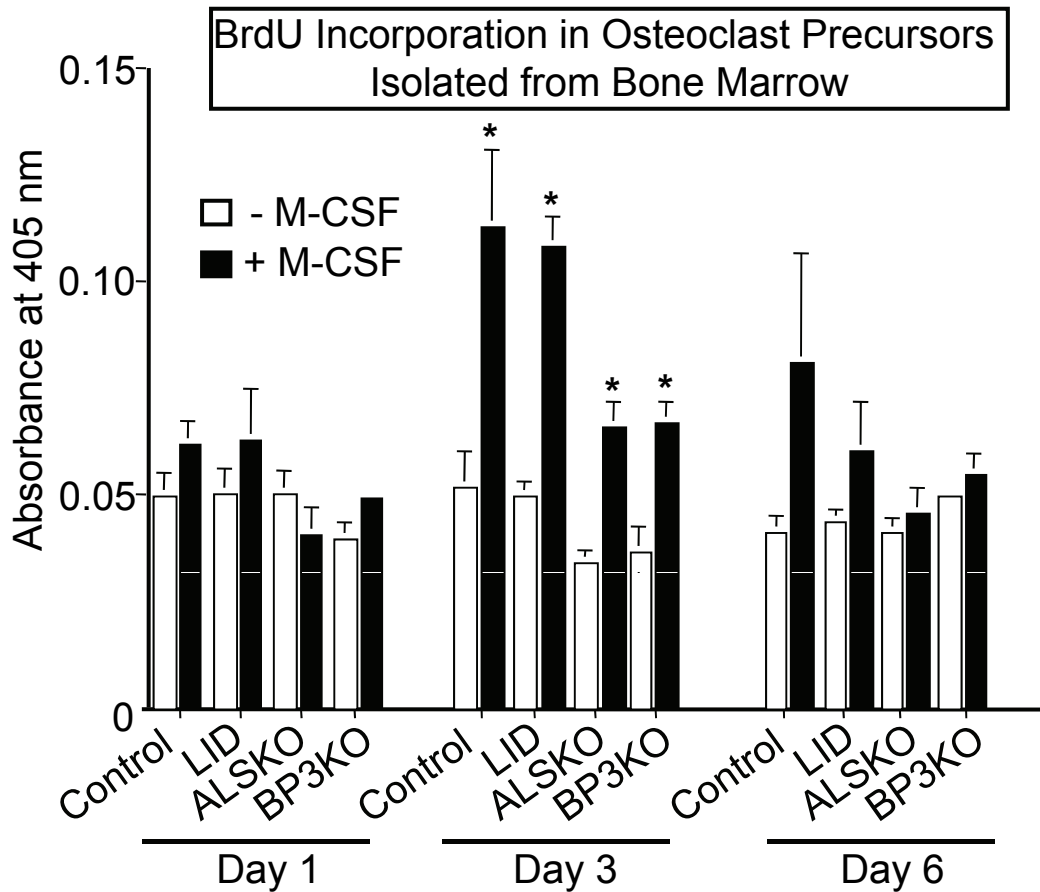

Supp. Fig. 3. Monocyte differentiation is not affected by the constituents of IGF-1 complexes. BrdU was used in the detection of proliferation of pre-osteoclasts (OC) upon stimulation with M-CSF in primary culture (n=5 mice per group). BrdU incorporates into the newly synthesized DNA of replicating cells and in this assay determines the ability of OCs to differentiate from precursors. Pre-OCs in all groups exhibited active replication of their DNA 3 d after induction with M-CSF (30 ng/ml), which was complete by day 6. Data are expressed as mean  $\pm$  SEM. \*  $p < 0.05$  + versus - M-CSF. *BrdU assay*- Bone marrow cells isolated from 16-w-old male mice, were cultured in  $\alpha$ MEM with 10% FBS for 1 d. Non-adherent cells were collected and plated on 96-well plates in the presence or absence of M-CSF. BrdU was added to the cultures 8 hours prior to fixation. Following fixation of cells, cellular DNA was digested and exposed to peroxidase conjugated anti-BrdU antibody.
