# Supplementary material
Source: PubMed Central journal article supplement (PMC2836075)
Supplement: supp_M109.041913_jbc.M109.041913-4.pdf [file supp_M109.041913_jbc.M109.041913-4.pdf]

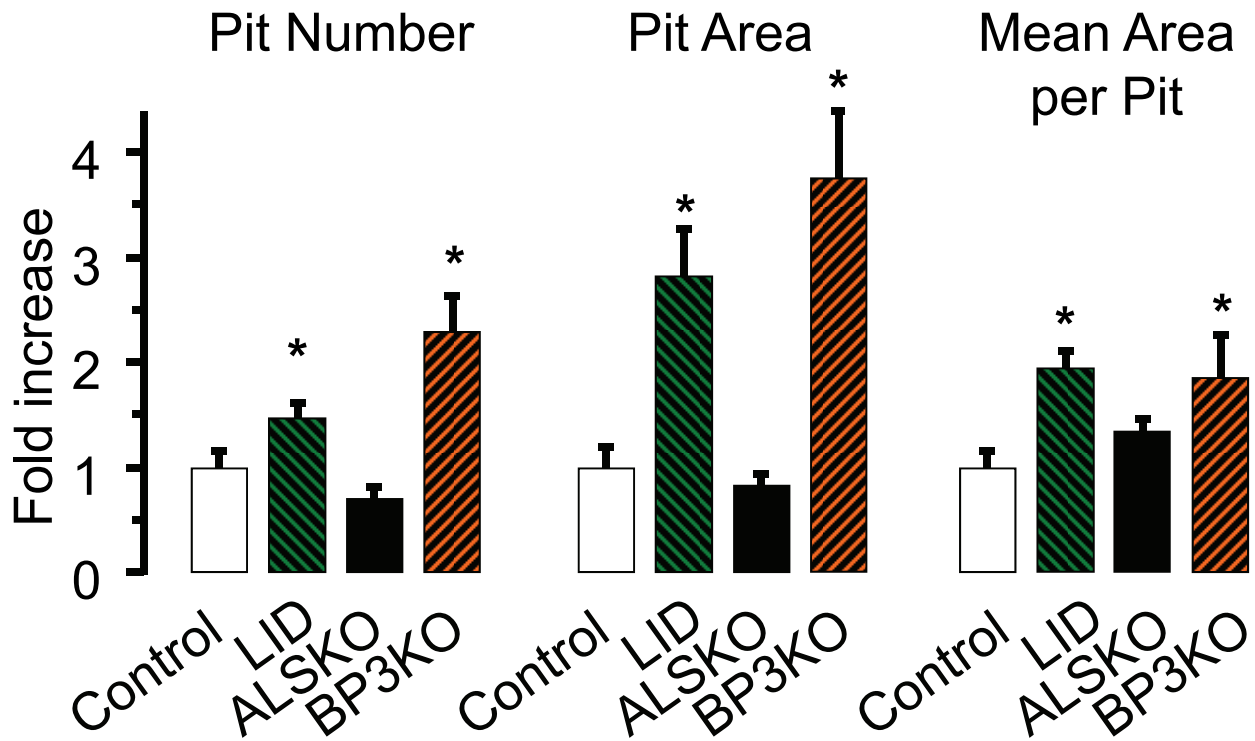

Supp. Fig. 4. Function on calcium hydroxyapatite-coated discs is not altered for OC derived from ALSKO mice. Cultures on a mineral substrate revealed a similar total number of pits, total pit area and average pit area formed from ALSKO and Control mice. Data are expressed as mean  $\pm$  SEM. \*  $p < 0.05$  versus Control. *OC pit assays*- BM cells were isolated and cultured as in Methods (n=4 mice per group). Non-adherent cells were re-plated ( $3 \times 10^4$ ) on BD BioCoat,<sup>TM</sup> Osteologic<sup>TM</sup> calcium hydroxyapatite-coated discs (BD Biosciences, Bedford, MA, USA) in osteoclastogenic conditions for 7 d as detailed in the Supplemental Fig. 1 caption. On day 8, cells were washed vigorously, the discs stained with Von Kossa and the calcified-matrix resorption pit numbers and areas on each disc quantified. Results were documented using digital image capture on a microscope (Sony 3CCCD-IRIS Color Video Camera Model DXC-960MD, ImagePro Plus v5.0.1.11 software for acquisition in Microsoft Windows XP, and Nikon Diaphot DIC Inverted microscope with ScopePro XY Stage v4.1). Tiled images were assembled into merged figures using Photoshop (Adobe CS4).
